# Supplementary material for: The Spectrum of SWI/SNF Mutations, Ubiquitous in Human Cancers
Source: PubMed Central journal article supplement (PMC3552954; doi:10.1371/journal.pone.0055119), 2013-01-23

Figure S1

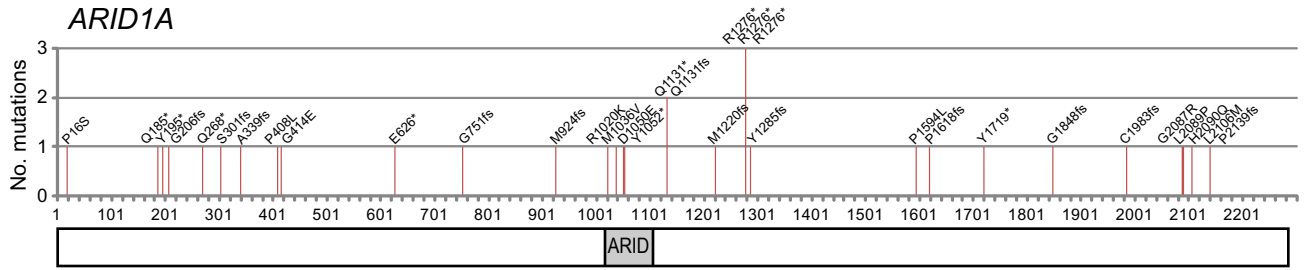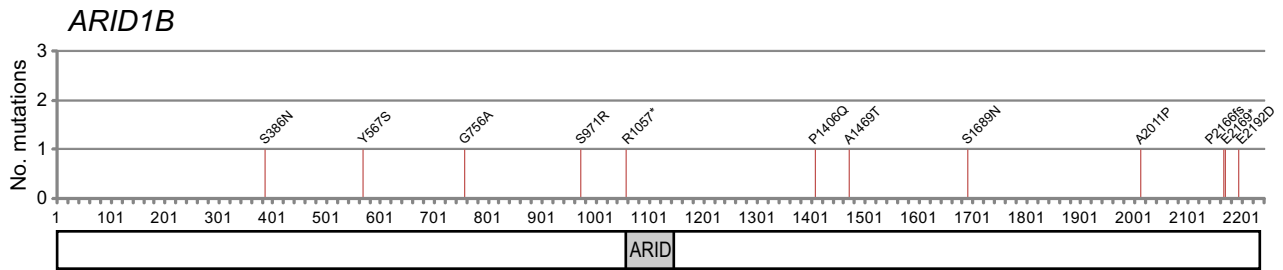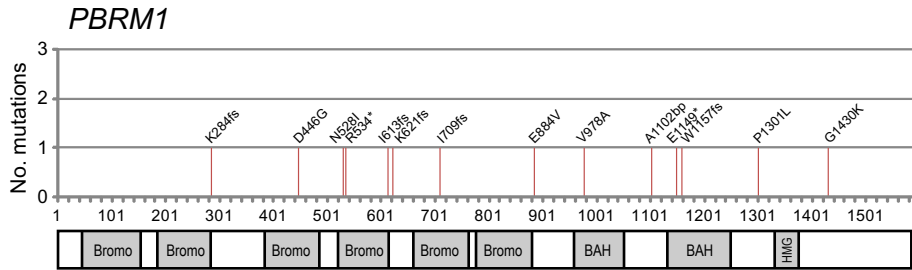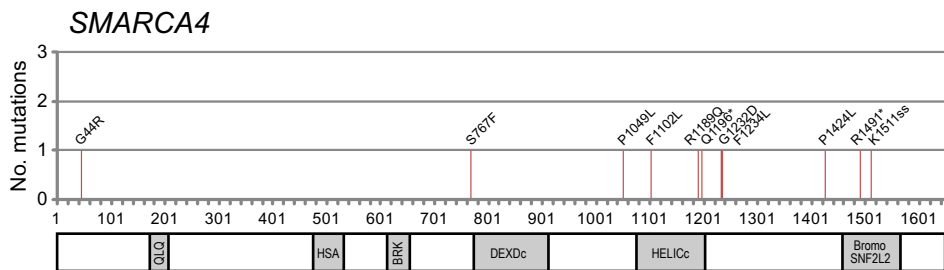

Supplement: pone.0055119.s001.pdf [file pone.0055119.s001.pdf]
