# Supplementary material for: The Spectrum of SWI/SNF Mutations, Ubiquitous in Human Cancers
Source: PLoS One. 2013 Jan 23;8(1):e55119. doi: 10.1371/journal.pone.0055119 (PMC3552954; doi:10.1371/journal.pone.0055119)
Supplement: Table S2 — Canonical SWI/SNF subunit mutational status in each study. (XLS) [file pone.0055119.s003.xls]

## Sheet: Sheet1
Table S2. Canonical SWI/SNF subunit mutational status in each study.
Cancer	n	Study	ARID1A	PBRM1	SMARCA4	ARID1B	ARID2	SMARCA2	SMARCB1	SMARCC1	SMARCC2	DPF2	ACTL6A	SMARCD3	PHF10	BRD7	SMARCD1	SMARCD2	SMARCE1	ACTL6B	DPF1	DPF3	total nonsynonymous	synonymous	LOH info
Breast	11	2	0	0	0	1 (missense-intol)	0	0	0	0	0	0	0	0	0	0	0	0	0	0	0	0	1	0	Y
CLL	105	1	2 (1 missense-ben, 1 nonsense)	0	0	0	0	0	0	0	0	1 (missense-prob)	0	1 (missense-ben)	0	0	0	0	0	0	0	0	4	N/A	N
CLL	91	21	0	1 (missense-prob)	0	1 (missense-prob)	0	0	0	0	0	0	0	0	0	2 (2 missense-prob)	0	0	0	0	0	0	4	N/A	N
Colon	11	2	0	0	0	0	0	0	0	0	0	0	0	0	0	0	0	0	0	0	0	0	0	0	Y
Gastric	22	3	6 (4 frameshift, 2 nonsense)	1 (frameshift)	0	3 (2 nonsense, 1synonymous)	0	0	0	1 (missense-prob)	0	0	0	0	0	0	0	0	0	0	0	0	10	1	N
Glioblastoma	22	4	1 ([1 missense-ben, 1 missense-prob]-same sample)	0	1 (missense-prob)	0	0	1 (missense-prob)	0	0	2 (missense-prob, synonymous)	0	0	0	0	0	0	0	0	0	0	0	4	1	Y
Head and Neck	74	5	1 (nonsense)	3 (1 frameshift, 1 missense-prob, 1 missense-poss)	2 (1 missense-prob, 1 missense-poss)	2 (1missense-prob, 1 missense-ben)	0	1 (missense-prob)	0	1 (synonymous)	1 (missense-ben)	0	0	0	0	0	0	0	0	0	0	0	10	1	N
Head and Neck	32	6	1 (nonsense)	0	0	0	1 (nonsense)	0	0	0	0	0	0	0	0	0	0	0	0	0	0	0	2	N/A	N
Hepatocellular	10	7	0	0	1 (nonsense)	0	2 (nonsense)	0	0	0	0	0	0	0	1 (nonsense)	0	0	0	0	0	0	0	4	N/A	N
Medulloblastoma	21	8	1 (frameshift)	0	1 (missense-poss)	0	0	0	0	0	0	0	0	0	0	0	0	0	0	0	0	0	2	0	N
Melanoma	14	9	1 (missense-prob)	0	1 (missense-prob)	0	2 (nonsense)	0	1 ([2 missense-prob, 1 missense-ben]-mutations same sample)	0	0	0	0	0	0	0	0	0	0	0	0	0	5	N/A	Y
Melanoma	7	19	3 (missense-prob, 2 nonsense)	0	4 (3 missense-prob, 1 synonymous)	0	0	1 (missense-pos)	0	1 (synonymous)	0	0	0	0	0	0	0	0	0	0	0	0	7	2	Y
Melanoma	8	20	1 (missense-prob)	0	0	0	1 (nonsense - hom)	0	0	1 (missense-ben)	0	0	0	0	0	0	0	0	0	0	0	0	3	N/A	Y
Multiple Myeloma	38	10	1 (missense-prob)	1 (rearrangement)	0	0	1 (missense-ben)	0	1 (missense-ben)	1 (rearrangement)	0	0	1 (missense-prob)	0	0	0	0	0	0	0	0	0	6	N/A	N
Myelodysplasia	28	11	0	0	0	0	0	0	0	0	0	0	0	0	0	0	0	0	0	0	0	0	0	N/A	N
Oligodendroglioma	7	12	0	0	0	0	0	0	0	0	0	0	0	0	0	0	0	0	0	0	0	0	0	N/A	N
Ovarian Clear Cell Carcinoma	8	13	5 ([1 frameshift, 1 nonsense]-same patient, 1 frameshift-hom, 2 frameshift, 1 nonsense)	0	1 (missense-prob)	1 (frameshift)	0	0	0	0	0	0	0	0	0	0	0	0	0	0	0	0	7	N/A	Y
Pancreatic	24	14	2 (nonsense, frameshift)	2 (1 nonsense-hom, 1 missense-ben)	2 (nonsense-hom, splice-site)	0	0	0	0	0	0	0	0	0	0	0	0	0	0	0	0	0	6	0	Y
Pancreatic	15	17	2 (1 missense-intol, 1 missense-intol-hom)	0	0	1 (missense-tol-hom)	0	0	0	0	0	0	1 (missense-intol-hom)	0	0	0	0	0	0	0	0	0	4	0	Y
Pancreatic Cyst	32	15	0	0	0	0	0	0	0	0	0	0	0	0	0	0	0	0	0	0	0	0	0	N/A	N
Pancreatic Neuroendocrine	10	16	0	0	0	0	0	0	0	0	0	0	0	0	0	0	0	0	0	0	0	0	0	N/A	Y
Renal Cell Carcinoma	7	18	2 (1 missense-poss, 1 missense-ben)	4 (3 frameshift, 1 nonsense)	0	0	0	0	0	0	0	0	0	0	0	0	0	0	0	0	0	0	0	0	N
Diffuse Large B-Cell Lymphoma	49	22	2 (1frameshift, 1 nonsense)	1 (missense-prob)	0	4 (missense-nd)	1 (synonymous)	0	0	0	1 (nonsense)	0	0	1 (nonsense)	0	0	0	0	0	0	0	0	9	1	N
Diffuse Large B-Cell Lymphoma	6	23	0	0	0	0	0	0	0	0	0	1 (splicing-site)	0	0	0	0	0	0	0	0	0	0	1	N/A	N
Diffuse Large B-Cell Lymphoma	13	24	0	1 (missense-prob)	0	0	0	0	0	0	0	1 (missense-benign)	0	0	0	0	0	0	0	0	0	0	2	N/A	N
	665		0.0406015
Red Text	Likely loss of heterozygosity -- either sequencing reads support LOH or there were two mutations in the same gene in the same sample
	Note: Not all studies attempted reported the zygosity for each gene. Even those that did, probably undercalled the try status because of normal cellular contamination
Missense mutation predicted effects when reported in each study are included here. If the effect was not reported, we manually determined the effect using Polyphen-2.
Missense-	prob	Probably damaging mutation as called by Polyphen-2
	poss	Possibly damaging mutation as called by Polyphen-2
	ben	Benign mutation as called by Polyphen-2
	intol	Intolerant mutation as called by SIFT
	tol	Tolerant mutation as called by SIFT
	nd	Not Determined. Usually because the specific mutated nucleotide was not available in the dataset
Synonymous	The mutation did not affect the amino acid sequence. Note that not all studies included in information.
Nonsense	The mutation generated an early termination codon
Frameshift	The mutation led to the insertion or deletion of nucleotide(s) such that the reading frame of the transcript is altered
Rearrangement	A genomic rearrangement of exon structure occurred. Only one study reported rearrangements, so these events are likely undercalled
